# Supplementary material
Source: ML conference proceedings conference paper supplement (https://proceedings.mlr.press/v183/rushe22a.html)
Supplement: Supplementary file 1 [file rushe22a-supp.pdf]

## 7. Appendix

Table 4: A comparison of the best performing CANDE-CP algorithm, *CANDE embed* from Table 1 against CANDE with oracle predictions, *CANDE embed oracle*, and individual models trained on each context separately, *AE indiv*, in terms of PR-AUC  $\pm$  95% confidence intervals.

| Machine Name | ID   | SNR               | AE indiv.         | CANDE embed oracle | CANDE-CP embed    |
|--------------|------|-------------------|-------------------|--------------------|-------------------|
| fan          | 00   | 0dB               | 0.564 $\pm$ 0.028 | 0.548 $\pm$ 0.038  | 0.541 $\pm$ 0.037 |
|              |      | 6dB               | 0.783 $\pm$ 0.013 | 0.741 $\pm$ 0.029  | 0.733 $\pm$ 0.027 |
|              |      | -6dB              | 0.540 $\pm$ 0.012 | 0.518 $\pm$ 0.028  | 0.519 $\pm$ 0.026 |
|              | 02   | 0dB               | 0.816 $\pm$ 0.113 | 0.869 $\pm$ 0.014  | 0.856 $\pm$ 0.015 |
|              |      | 6dB               | 0.963 $\pm$ 0.011 | 0.941 $\pm$ 0.030  | 0.935 $\pm$ 0.033 |
|              |      | -6dB              | 0.593 $\pm$ 0.013 | 0.631 $\pm$ 0.037  | 0.628 $\pm$ 0.034 |
|              | 04   | 0dB               | 0.682 $\pm$ 0.018 | 0.670 $\pm$ 0.063  | 0.662 $\pm$ 0.061 |
|              |      | 6dB               | 0.912 $\pm$ 0.007 | 0.890 $\pm$ 0.028  | 0.846 $\pm$ 0.034 |
|              |      | -6dB              | 0.462 $\pm$ 0.007 | 0.458 $\pm$ 0.034  | 0.457 $\pm$ 0.034 |
| 06           | 0dB  | 0.963 $\pm$ 0.007 | 0.983 $\pm$ 0.031 | 0.949 $\pm$ 0.078  |                   |
|              | 6dB  | 0.998 $\pm$ 0.004 | 0.998 $\pm$ 0.002 | 0.961 $\pm$ 0.052  |                   |
|              | -6dB | 0.754 $\pm$ 0.045 | 0.777 $\pm$ 0.196 | 0.768 $\pm$ 0.194  |                   |
| pump         | 00   | 0dB               | 0.399 $\pm$ 0.089 | 0.466 $\pm$ 0.197  | 0.458 $\pm$ 0.187 |
|              |      | 6dB               | 0.593 $\pm$ 0.173 | 0.591 $\pm$ 0.199  | 0.526 $\pm$ 0.172 |
|              |      | -6dB              | 0.332 $\pm$ 0.022 | 0.409 $\pm$ 0.117  | 0.409 $\pm$ 0.117 |
|              | 02   | 0dB               | 0.249 $\pm$ 0.033 | 0.281 $\pm$ 0.111  | 0.279 $\pm$ 0.109 |
|              |      | 6dB               | 0.256 $\pm$ 0.070 | 0.285 $\pm$ 0.171  | 0.286 $\pm$ 0.149 |
|              |      | -6dB              | 0.190 $\pm$ 0.034 | 0.239 $\pm$ 0.081  | 0.239 $\pm$ 0.080 |
|              | 04   | 0dB               | 0.878 $\pm$ 0.108 | 0.916 $\pm$ 0.046  | 0.869 $\pm$ 0.044 |
|              |      | 6dB               | 0.968 $\pm$ 0.043 | 0.971 $\pm$ 0.033  | 0.916 $\pm$ 0.038 |
|              |      | -6dB              | 0.752 $\pm$ 0.057 | 0.800 $\pm$ 0.029  | 0.784 $\pm$ 0.029 |
| 06           | 0dB  | 0.234 $\pm$ 0.073 | 0.227 $\pm$ 0.109 | 0.227 $\pm$ 0.105  |                   |
|              | 6dB  | 0.286 $\pm$ 0.189 | 0.247 $\pm$ 0.184 | 0.240 $\pm$ 0.169  |                   |
|              | -6dB | 0.220 $\pm$ 0.030 | 0.212 $\pm$ 0.067 | 0.207 $\pm$ 0.055  |                   |
| slider       | 00   | 0dB               | 0.934 $\pm$ 0.011 | 0.930 $\pm$ 0.027  | 0.930 $\pm$ 0.027 |
|              |      | 6dB               | 0.992 $\pm$ 0.001 | 0.986 $\pm$ 0.009  | 0.986 $\pm$ 0.011 |
|              |      | -6dB              | 0.842 $\pm$ 0.023 | 0.838 $\pm$ 0.045  | 0.833 $\pm$ 0.043 |
|              | 02   | 0dB               | 0.357 $\pm$ 0.018 | 0.410 $\pm$ 0.105  | 0.643 $\pm$ 0.180 |
|              |      | 6dB               | 0.256 $\pm$ 0.017 | 0.283 $\pm$ 0.044  | 0.622 $\pm$ 0.435 |
|              |      | -6dB              | 0.356 $\pm$ 0.015 | 0.376 $\pm$ 0.027  | 0.482 $\pm$ 0.097 |
|              | 04   | 0dB               | 0.669 $\pm$ 0.230 | 0.802 $\pm$ 0.080  | 0.799 $\pm$ 0.078 |
|              |      | 6dB               | 0.731 $\pm$ 0.516 | 0.903 $\pm$ 0.052  | 0.841 $\pm$ 0.051 |
|              |      | -6dB              | 0.540 $\pm$ 0.061 | 0.639 $\pm$ 0.066  | 0.634 $\pm$ 0.063 |
| 06           | 0dB  | 0.265 $\pm$ 0.030 | 0.296 $\pm$ 0.043 | 0.294 $\pm$ 0.041  |                   |
|              | 6dB  | 0.369 $\pm$ 0.018 | 0.422 $\pm$ 0.134 | 0.407 $\pm$ 0.119  |                   |

**Table 4 (cont.)**

| Machine Name | ID | SNR  | AE indiv.   | CANDE embed oracle | CANDE-CP embed |
|--------------|----|------|-------------|--------------------|----------------|
|              |    | -6dB | 0.255±0.018 | 0.257±0.004        | 0.254±0.004    |
|              |    | 0dB  | 0.201±0.023 | 0.184±0.015        | 0.183±0.015    |
|              | 00 | 6dB  | 0.195±0.075 | 0.178±0.060        | 0.178±0.060    |
|              |    | -6dB | 0.221±0.024 | 0.198±0.025        | 0.198±0.024    |
|              |    | 0dB  | 0.331±0.006 | 0.368±0.027        | 0.349±0.024    |
|              | 02 | 6dB  | 0.372±0.017 | 0.428±0.065        | 0.422±0.061    |
|              |    | -6dB | 0.253±0.025 | 0.278±0.006        | 0.269±0.002    |
| valve        |    | 0dB  | 0.280±0.064 | 0.240±0.049        | 0.238±0.049    |
|              | 04 | 6dB  | 0.298±0.079 | 0.237±0.035        | 0.232±0.033    |
|              |    | -6dB | 0.205±0.040 | 0.189±0.038        | 0.189±0.038    |
|              |    | 0dB  | 0.232±0.032 | 0.227±0.025        | 0.224±0.025    |
|              | 06 | 6dB  | 0.275±0.023 | 0.297±0.043        | 0.282±0.037    |
|              |    | -6dB | 0.214±0.029 | 0.200±0.006        | 0.188±0.004    |
